# Supplementary material for: PPAR Pan Agonist MHY2013 Alleviates Renal Fibrosis in a Mouse Model by Reducing Fibroblast Activation and Epithelial Inflammation
Source: MDPI journal article supplement (doi:10.3390/ijms24054882), 2023-03-02
Supplement: s1 [file s1]

**Table S1. Information of Antibodies used in Western blotting**

| <b>Antibody</b>   | <b>Company</b> | <b>Catalog number</b> |
|-------------------|----------------|-----------------------|
| $\alpha$ -SMA     | Santa Cruz     | sc 32251              |
| Colla1            | Santa Cruz     | sc 293182             |
| Colla2            | Santa Cruz     | sc 393573             |
| Vim               | Cell signaling | #5741                 |
| p-SMAD2           | Abcam          | Ab184557              |
| p-SMAD3           | Abbkine        | ABP50494              |
| p65               | Santa Cruz     | sc 514451             |
| p-p65             | Santa Cruz     | sc 136548             |
| $\beta$ -actin    | Santa Cruz     | sc 47778              |
| $\alpha$ -Tubulin | Santa Cruz     | sc 5286               |

**Table S2. Primer sequences for qPCR**

| <b>Mouse</b>  |                            |                            |
|---------------|----------------------------|----------------------------|
| <b>Gene</b>   | <b>Forward (5'-3')</b>     | <b>Reverse (3'-5')</b>     |
| <i>Havcr1</i> | GTG GAA GTA AAG GGG GTG GT | TGC CCC TTT AAG TTG TAC CG |
| <i>Timp2</i>  | GCA TCA CCC AGA AGA AGA GC | GGG TCC TCG ATG TCA AGA AA |
| <i>Igfbp7</i> | ATG AAG GAG CTG GCT GTG TT | GGG ATG TGC AGG GAG TAG AG |
| <i>Spp1</i>   | TCT GAT GAG ACC GTC ACT GC | AGG TCC TCA TCT GTG GCA TC |
| <i>Colla2</i> | GAT GGC TGC TCC AAA AAG AC | CAA TGT CCA GAG GTG CAA TG |
| <i>Col3a1</i> | AGG ATC TGT CCT TTG CGA TG | TCT CCA AAT GGG ATC TCT GG |
| <i>VIM</i>    | ATG CTT CTC TGG CAC GTC TT | AGC CAC GCT TTC ATA CTG CT |
| <i>Tnfa</i>   | GCT TTC CGA ATT CAC TGG AG | TTG CAC CTC AGG GAA GAA TC |
| <i>Il1β</i>   | GCT GCT TCC AAA CCT TTG AC | TTC TCC ACA GCC ACA ATG AG |
| <i>Ccl2</i>   | CTG GAT CGG AAC CAA ATG AG | TGA GGT GGT TGT GGA AAA GG |
| <i>Emr1</i>   | ACC ATC ACC TAT GGA CCC AA | CCC AGT CAT GGT CTC CAG TT |
| <i>GAPDH</i>  | AAG GTC ATC CCA GAG CTG AA | CTG CTT CAC CAC CTT CTT GA |
| <b>Rat</b>    |                            |                            |
| <b>Gene</b>   | <b>Forward (5'-3')</b>     | <b>Reverse (3'-5')</b>     |
| <i>Ccl2</i>   | GCCAACTCTCACTG AGCCA       | GCATCTGGCTGAGACAGCAC       |
| <i>Ccl5</i>   | ATATGGCTCGGACACCACTC       | CCACTTCTTCTCTGGGTTGG       |
| <i>Cxcl1</i>  | GCTGGGATTACCTCAAGAA        | TGGGGACACCTTTTAGCATC       |
| <i>Colla2</i> | TTG ACC CTA ACC AAG GAT GC | CAC CCC TTC TGC GTT GTA TT |
| <i>Acta2</i>  | ACT GGG ACG ACA TGG AAA AG | CAT CTC CAG AGT CCA GCA CA |
| <i>Vim</i>    | TGC ACG ATG AAG AGA TCC AG | TGG CAG CCA CAC TTT CAT AC |
| <i>GAPDH</i>  | TGC TGG TGC TGA GTA TGT CG | AGT TGG TGG TGC AGG ATG C  |
